# Supplementary material for: Prospective multicentric validation of a novel prediction model for paroxysmal atrial fibrillation
Source: Springer Nature journal article supplement (doi:10.1007/s00392-020-01773-z), 2020-11-19
Supplement: MOESM1 [file 18603232]

## SUPPLEMENTARY MATERIAL

### Prospective multicentric validation of a novel prediction model

#### for paroxysmal atrial fibrillation

Constanze Schmidt<sup>1,2</sup>, Sebastian Benda<sup>1,2</sup>, Patricia Kraft<sup>3</sup>, Felix Wiedmann<sup>1,2</sup>, Sven Pleger<sup>1,3</sup>,  
Antonius Büscher<sup>1,2</sup>, Dierk Thomas<sup>1,2</sup>, Rolf Wachter<sup>4</sup>, Christian Schmid<sup>5</sup>, Roland Eils<sup>6,7</sup>,  
Hugo A. Katus<sup>1,2</sup>, Stefan M. Kallenberger<sup>6,7</sup>

<sup>1</sup> Department of Cardiology, University of Heidelberg, Im Neuenheimer Feld 410, 69120 Heidelberg, Germany; <sup>2</sup> DZHK (German Center for Cardiovascular Research), Partner Site Heidelberg/Mannheim, University of Heidelberg, Im Neuenheimer Feld 410, 69120 Heidelberg, Germany; <sup>3</sup> Kardiologen am Brückenkopf, cardiology practice, Brückenkopfstraße 1/2, 69120 Heidelberg, Germany; <sup>4</sup> Clinic and Policlinic for Cardiology, University Hospital Leipzig, Liebigstraße 18, 04103 Leipzig, Germany and Clinic for Cardiology and Pneumology, University Medicine Göttingen, 37099 Göttingen, Germany; <sup>5</sup> Department of Internal Medicine, GPR Klinikum Rüsselsheim, August-Bebel-Straße 59, 65428 Rüsselsheim am Main, Germany; <sup>6</sup> Digital Health Center, Berlin Institute of Health (BIH) and Charité, Anna-Louisa-Karsch-Straße 2, Berlin, 10178, Germany; <sup>7</sup> Division of Theoretical Bioinformatics, German Cancer Research Center (DKFZ), Im Neuenheimer Feld 267, Heidelberg, 69120, Germany

**Corresponding author:** Constanze Schmidt; University Hospital Heidelberg; Department of Cardiology, INF 410, 69120 Heidelberg, Germany; Constanze.Schmidt@med.uni-heidelberg.de

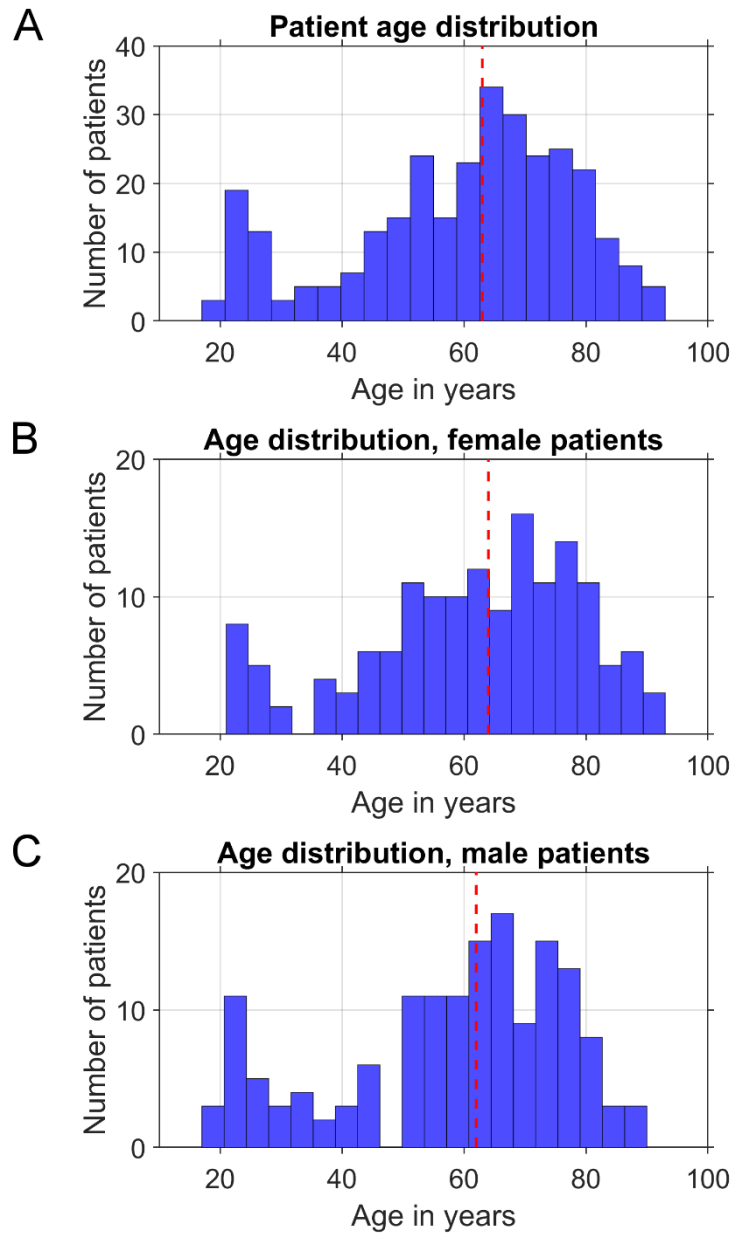

**Fig. S1** Patient age distributions: patient age distributions are shown for (A) all patients, (B) female patients, and (C) male patients. Median ages are indicated by dashed red lines (median age: 63, median age in female patients: 64, median age in male patients: 62)

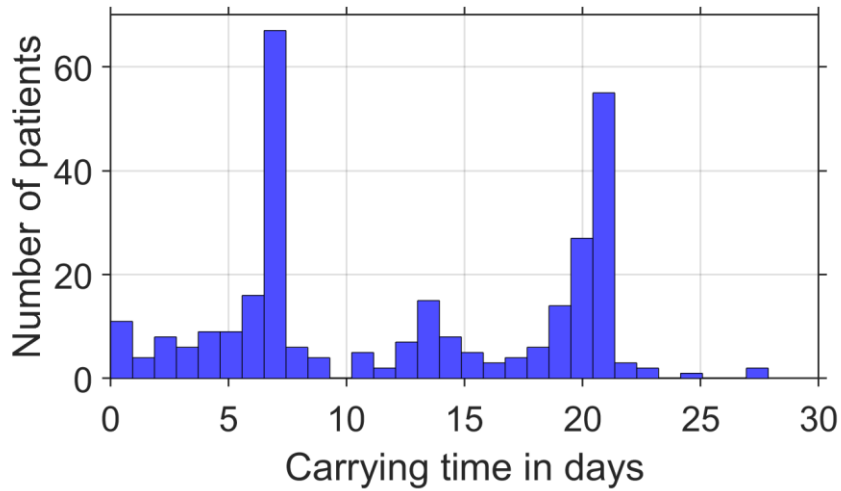

**Fig. S2** Distribution of Holter ECG device carrying times. Holter ECG devices were carried in intervals of one week length for up to three weeks, which explains histogram peaks around 1 week, 2 weeks and 3 weeks. A few patients carried the device for four weeks

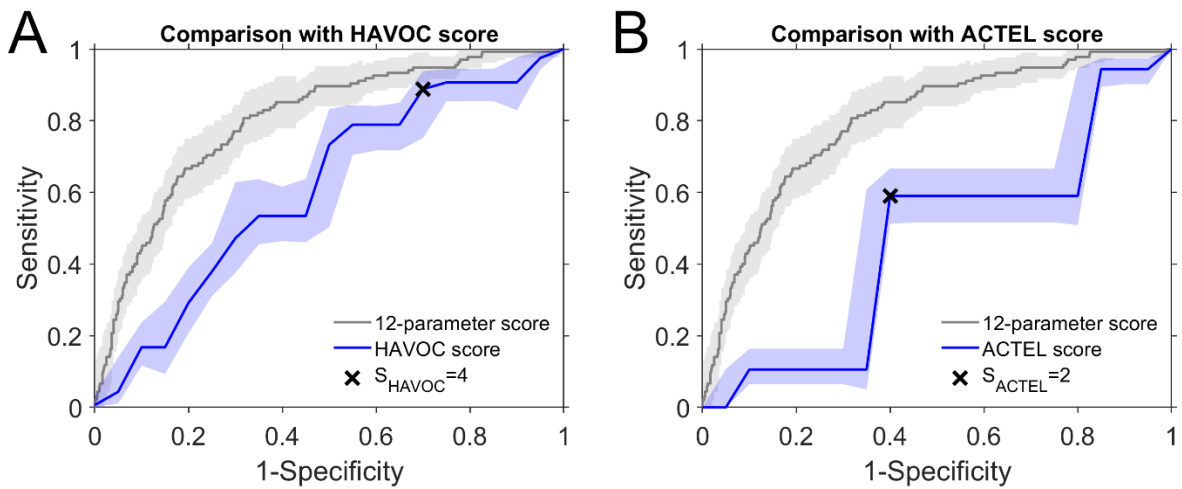

**Fig. S3** Comparison with ROC curves for other prediction scores: (A) the HAVOC score [AUC 0.66 (95%-C.I.: 0.61, 0.70); the 'x' symbol indicates sensitivity and 1-specificity values for the suggested cut-off score value of 4], and (B) the ACTEL score [AUC 0.64 (95%-C.I.: 0.60, 0.68); the 'x' symbol indicates sensitivity and 1-specificity values for the suggested cut-off score value of 2]

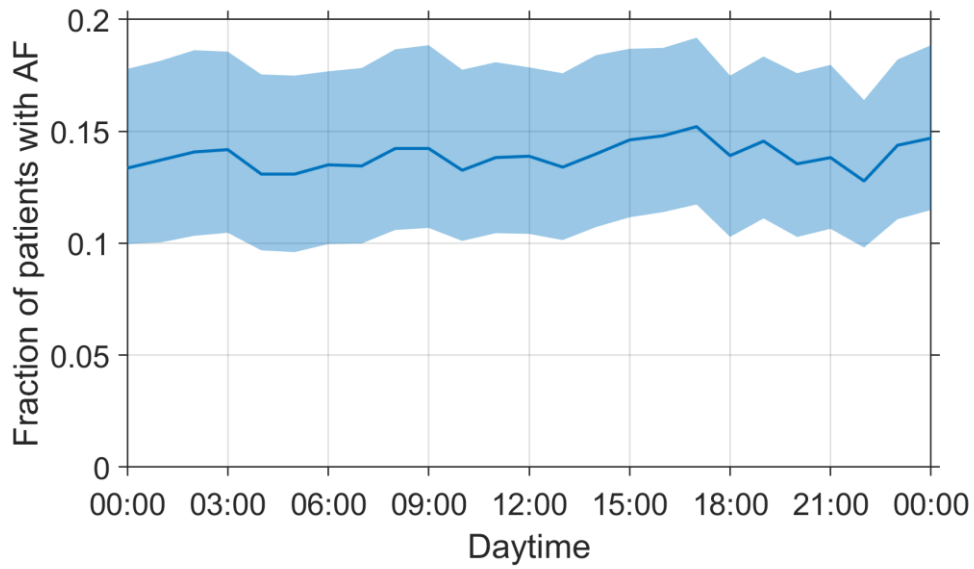

**Fig. S4** Circadian frequency of AF episodes: for all patients and all days, fractions of AF presence over daytime were calculated (shaded areas: 95% confidence intervals estimated by bootstrapping with  $n=1000$  samples)

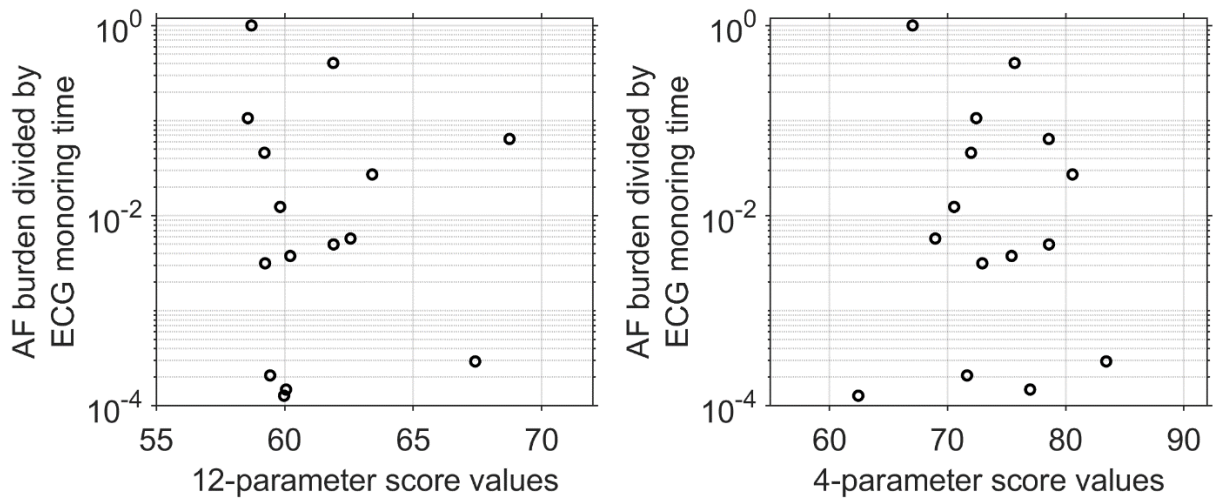

**Fig. S5** Values of pAF scores and AF burden normalized by ECG monitoring time. Values of the 12-parameter score (left) and the 4-parameter score were not correlated with AF burden

**Table S1.** Comparison of serum parameters between patient groups.

|                                             | <b>SR</b>             | <b>pAF</b>            |
|---------------------------------------------|-----------------------|-----------------------|
| <i>Parameters</i>                           |                       |                       |
| GFR (CKD-EPI), ml/(min·1.73m <sup>2</sup> ) | 83.8±16.4<br>(n=34)   | 74.3±22.1<br>(n=33)   |
| Serum creatinine, mg/dl                     | 0.86±0.18<br>(n=35)   | 1.11±0.99<br>(n=30)   |
| NT-proBNP, ng/l                             | 4,458±8,375<br>(n=14) | 1,821±3,959<br>(n=22) |
| Troponin T hs, ng/l                         | 190±573<br>(n=23)     | 159±359<br>(n=26)     |

Means, standard deviations and numbers of patients are indicated. GFR (CKD-EPI), glomerular filtration rate estimated by the chronic kidney disease epidemiology collaboration formula; NT-proBNP, N-terminal pro-B-type natriuretic peptide; hs, high-sensitive. Differences between SR and pAF groups, assessed by ANOVA, were not significant.
